# Supplementary material for: A conjoined universal helper epitope can unveil antitumor effects of a neoantigen vaccine targeting an MHC class I-restricted neoepitope
Source: PubMed Central journal article supplement (PMC7814002; doi:10.1038/s41541-020-00273-5), 2021-01-18
Supplement: 41541_2020_273_MOESM2_ESM.pdf [file 41541_2020_273_MOESM2_ESM.pdf]

## Animals and other organisms

---

Policy information about [studies involving animals](#); [ARRIVE guidelines](#) recommended for reporting animal research

Laboratory animals

Six to 12 week old male VMDK and 129S6 mice were used for these studies

Wild animals

Wild animals were not involved in these studies.

Field-collected samples

This study did not involve samples collected from the field.

Ethics oversight

Duke IACUC approved all animal protocols for this study

Note that full information on the approval of the study protocol must also be provided in the manuscript.
